# Supplementary material
Source: ML conference proceedings conference paper supplement (https://www.ecva.net/papers/eccv_2022/papers_ECCV/html/136990157_ECCV_2022_paper.php)
Supplement: Supplementary file 10 [file 136990157-supp.zip]

The diagram illustrates a sequence of transactions (TX 1 to TX 9) across 40 time steps. The grid is organized as follows:

- TX 1 (Red squares):** Occupies the first 4 time steps (columns 1-4).
- TX 2 (Blue squares):** Occupies the next 4 time steps (columns 5-8).
- TX 3 to TX 8 (Blue squares):** These transactions are represented by blue squares in the middle rows of the grid, indicating a sequence of transactions over time.
- TX 9 (Red squares):** Occupies the last 4 time steps (columns 37-40).

The grid is labeled with TX 1, TX 2, ..., TX 9 on the left and 1 to 40 on the top.
